# Supplementary material for: Evaluating the impact of faculty development programs at the workplace by using Reflective Critique writing technique
Source: Research Square preprint supplement (doi:10.21203/rs.3.rs-3718590/v1), 2023-12-13
Supplement: Supplementary file 1 [file 94bbd4e059d1d9dcf7b1440f.docx]

**Additional files**

1. **ERC form**

**
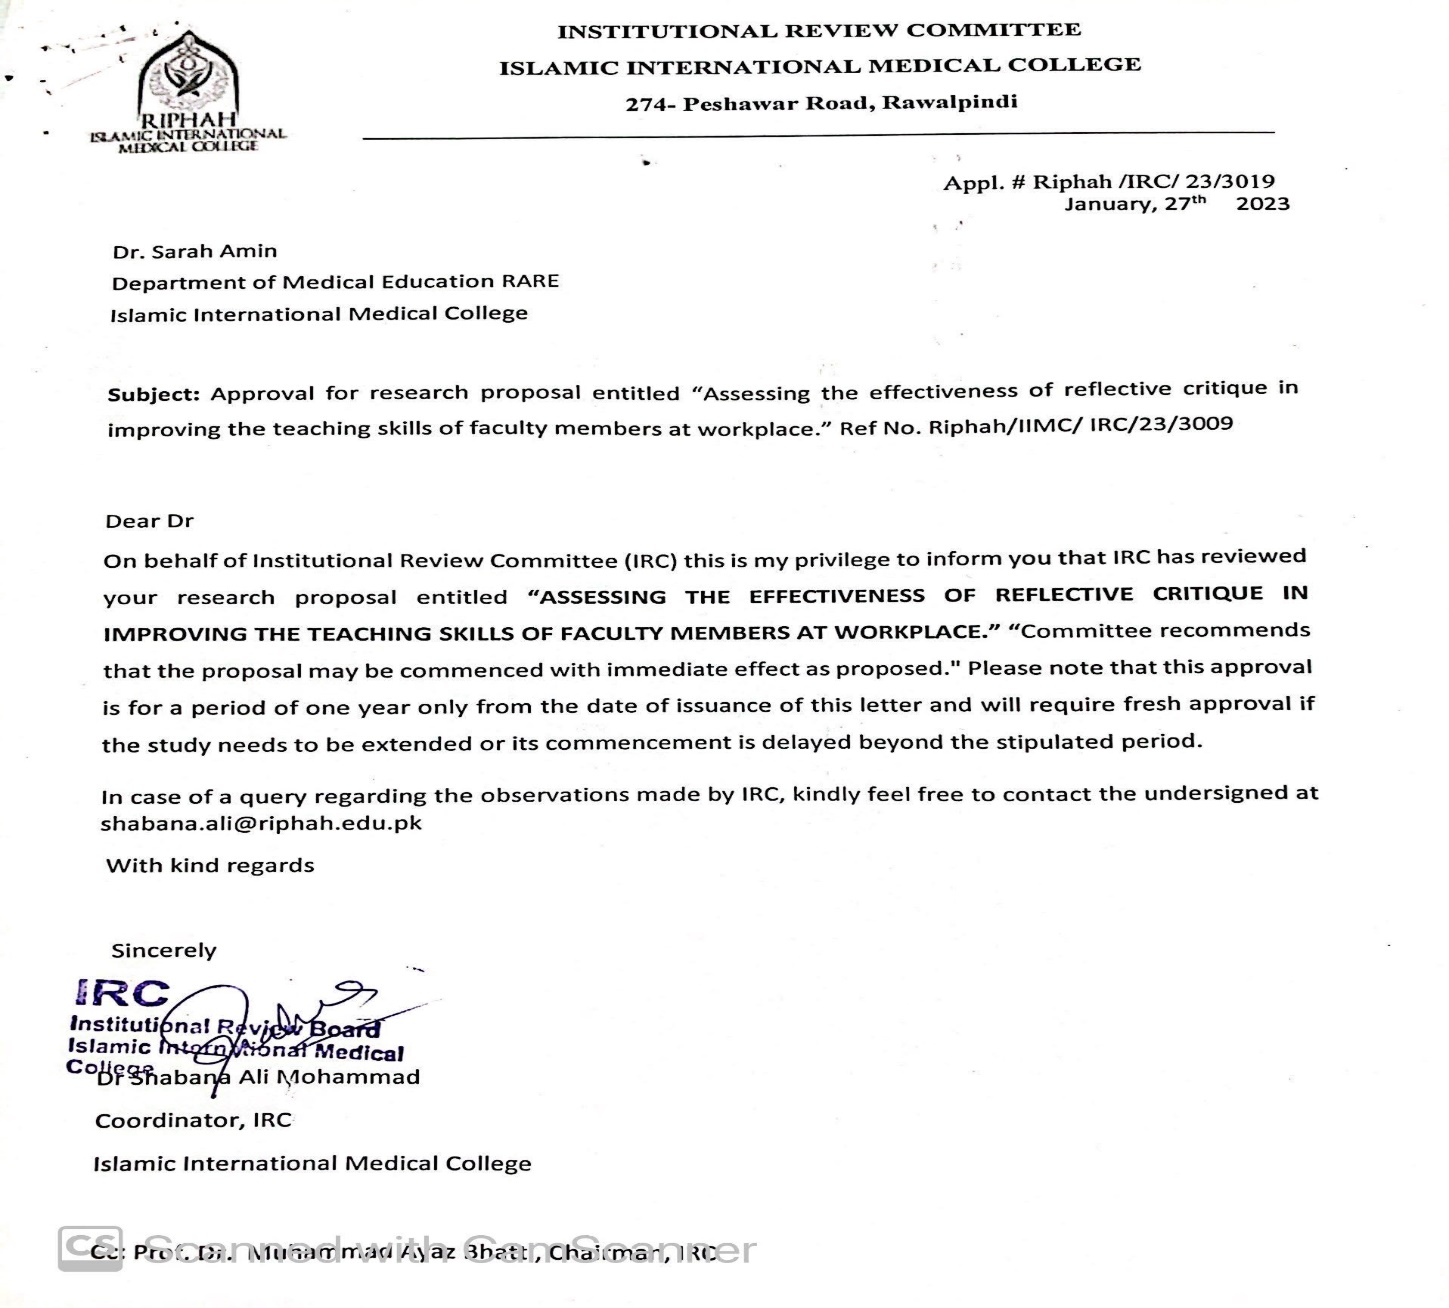
**

1. **Inclusion criteria & Exclusion Criteria**

- Faculty members with a minimum qualification of CHPE.
- Faculty from both basic and clinical side were included. (Medical college, IIMC)
- Faculty with more than 05 years of teaching experience were included.

**Exclusion criteria**

- Non CHPE & MHPE faculty will not be included in the studies.
- Faculty with less than 05 years of teaching experience will be excluded.
- Faculty who did not give consent was not involved in studies.

1. **Consent form for studies**


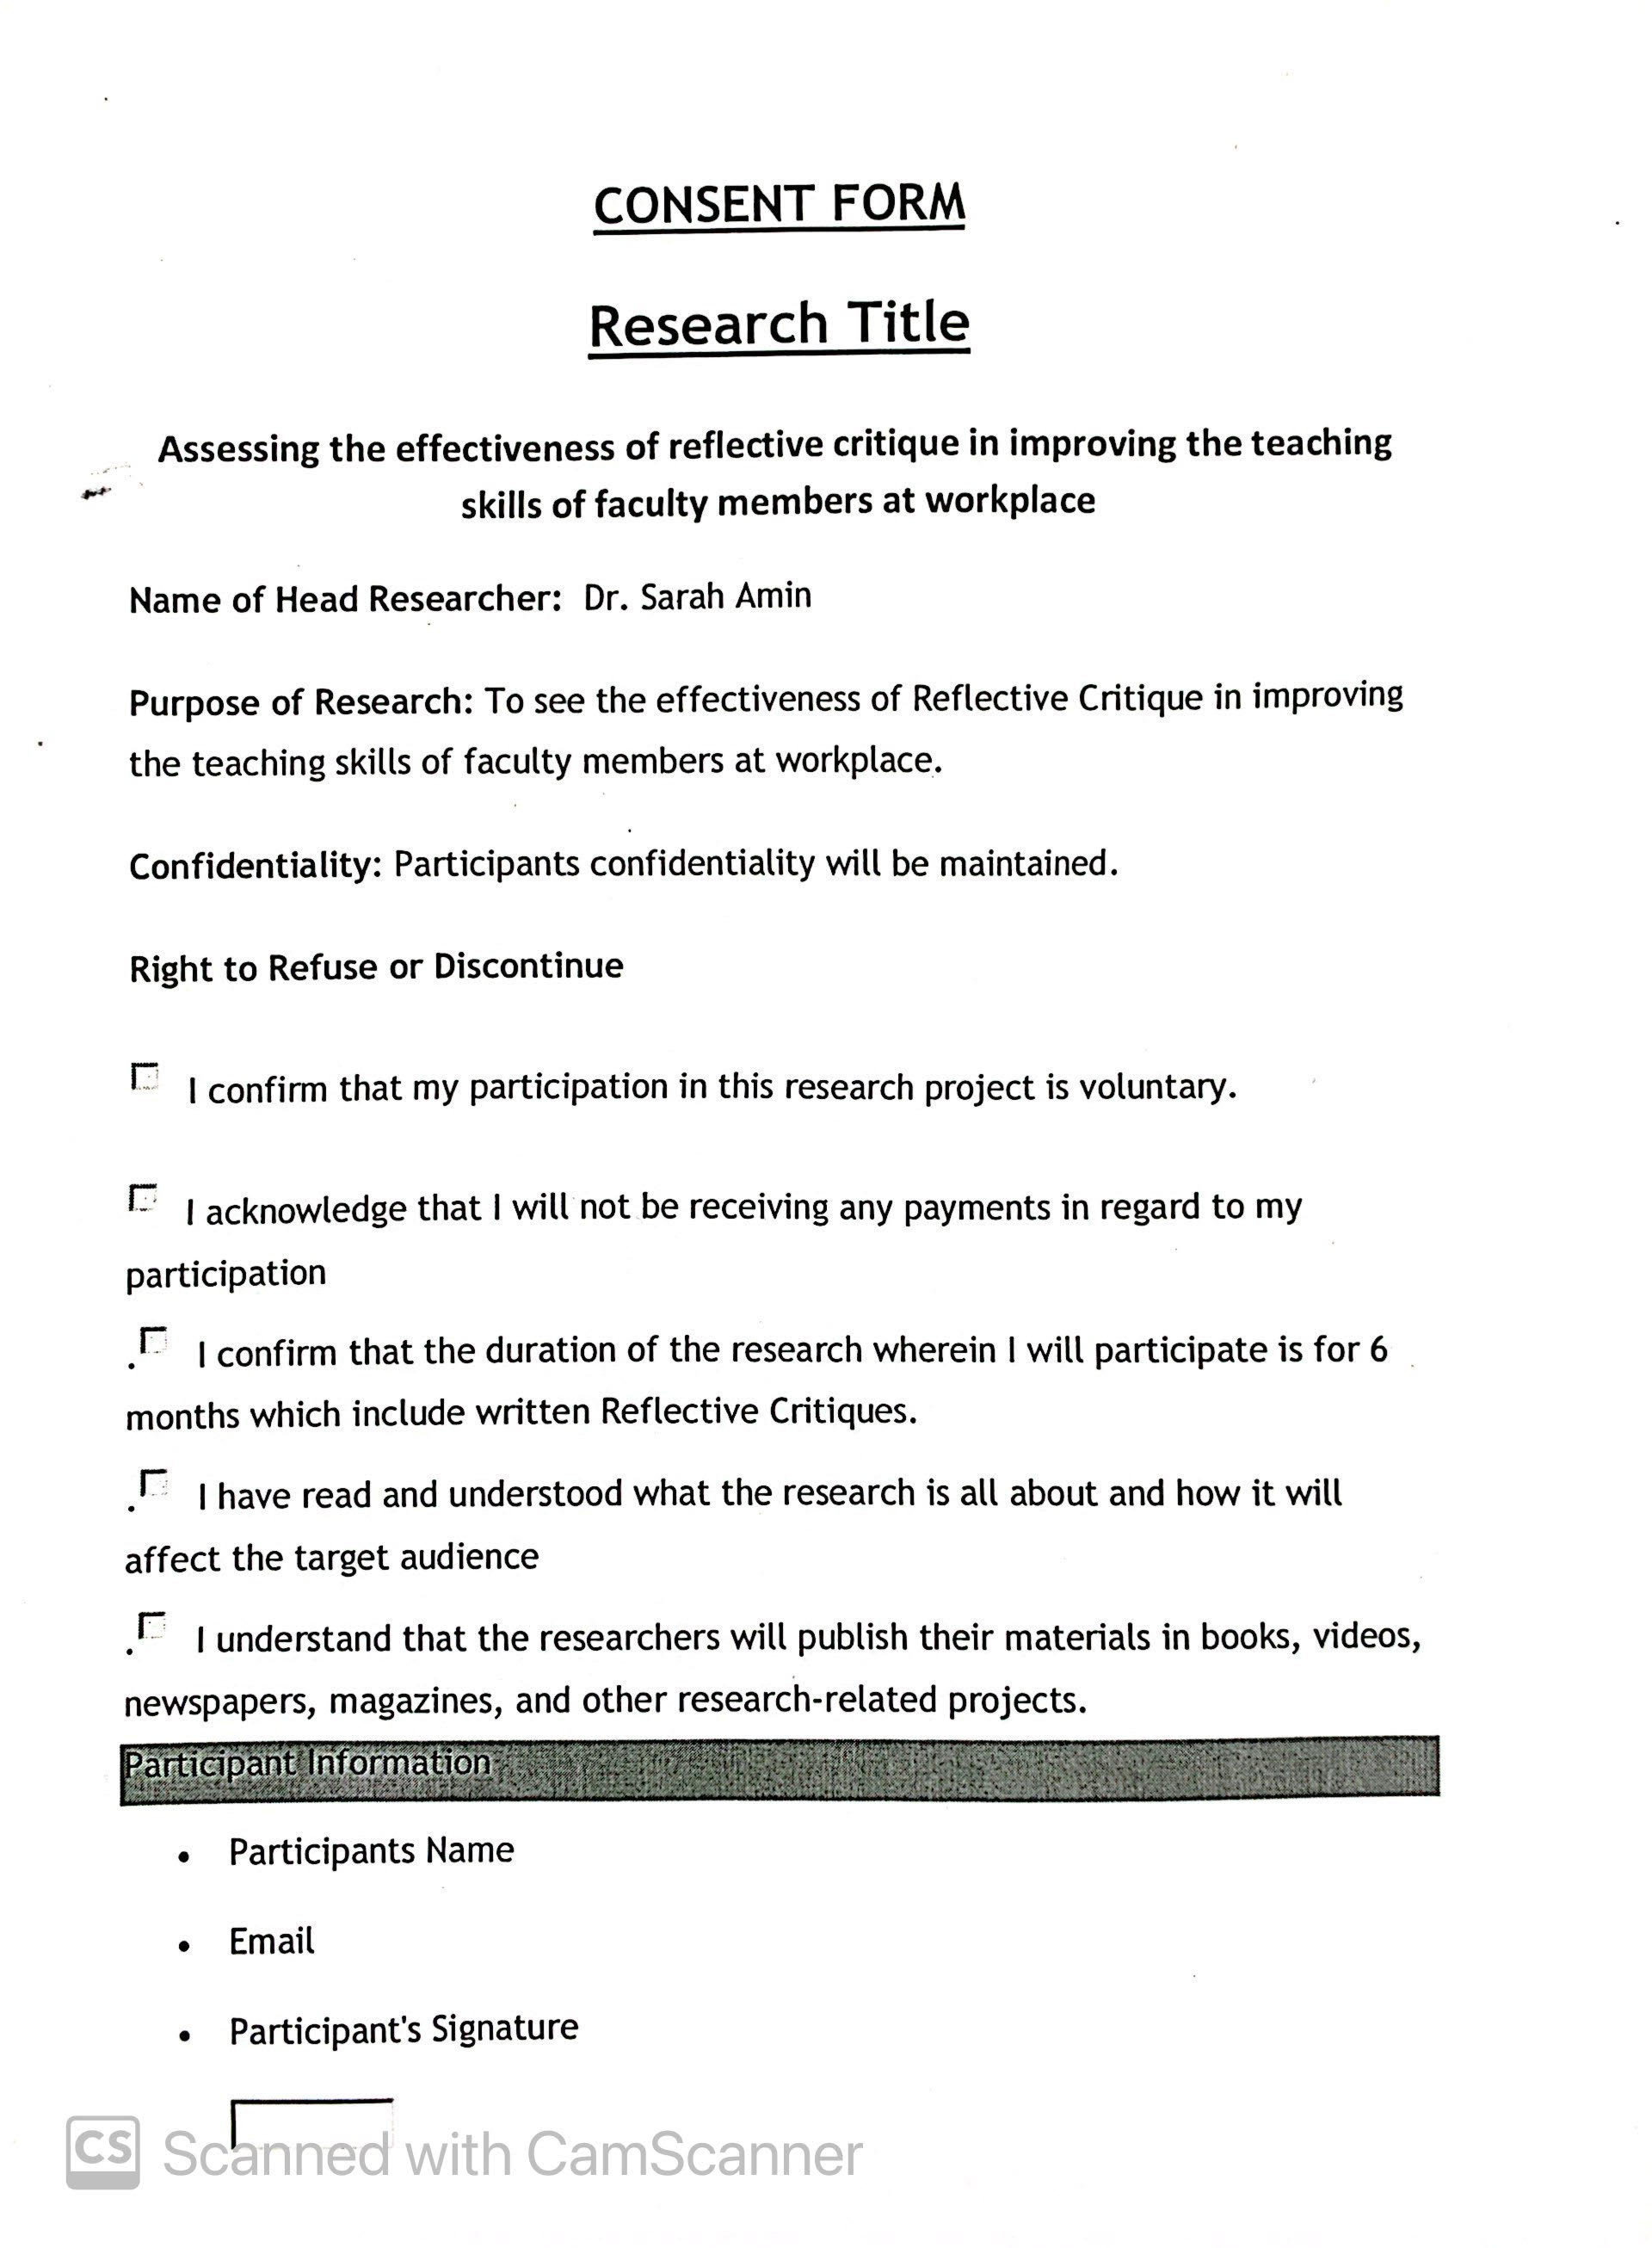


1. **G-Power calculator**


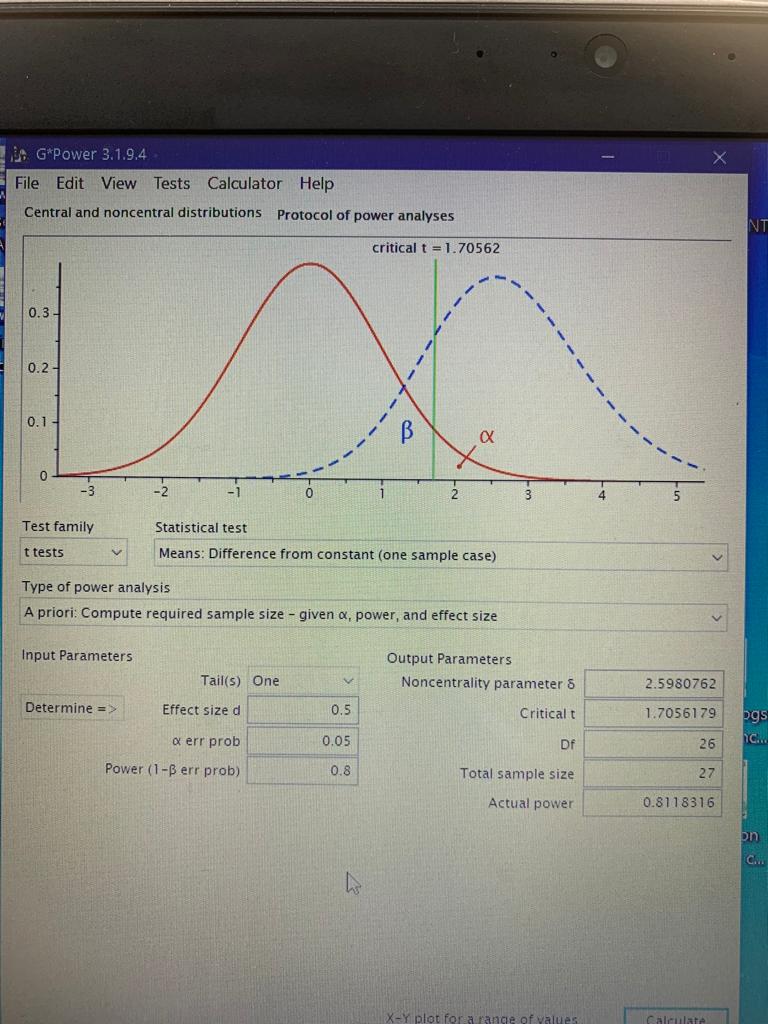


1. **What, so what & now what model**

**
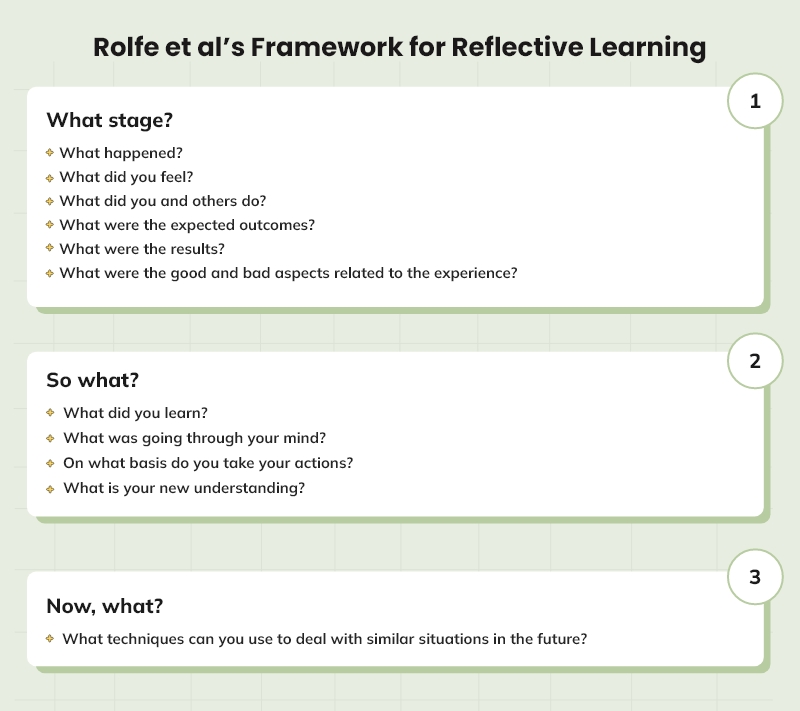
**

1. **REFLECT Rubric**

**
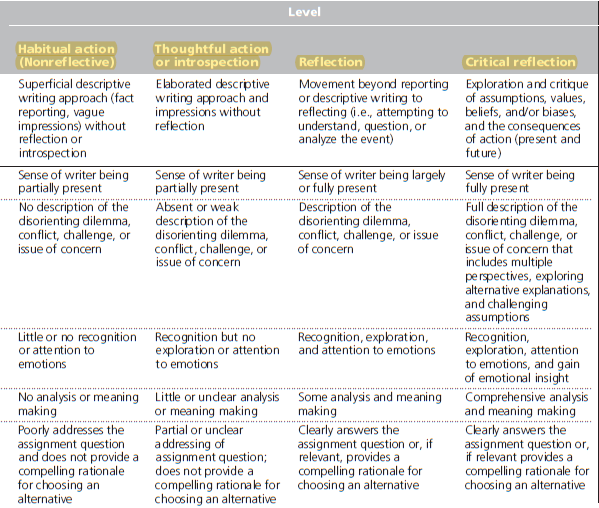
**

1. **Interview questions**

| Theory / Themes | Questions |
| --- | --- |
| Experiential learning theory | How did you feel about the experience of Case based learning workshop? What was the most important or relevant part of this experience?  Did you feel that the experience was a positive or negative one and why? |
| Transformative learning theory | Were there any environmental or other factors that influenced the experience?  How do you think this project will impact you, your students, discipline & your institution and your future action plan? |
| Reflective Critique & personal and professional development | How did the Reflective Critique writing change you personally & professionally?  Can you explain this with an example. |
| FDP & behavior change at workplace | Did this experience influence the way you do things now and if so, have you changed anything since that experience?  Have any of your previous beliefs changed as a result of the experience? If so how |
